# Supplementary material for: Effects of a Motor Imagery Task on Functional Brain Network Community Structure in Older Adults: Data from the Brain Networks and Mobility Function (B-NET) Study
Source: MDPI journal article supplement (doi:10.3390/brainsci11010118), 2021-01-17
Supplement: s1 [file s1]

**Supplemental Materials for:**

# **Effects of a Motor-Imagery Task on Functional Brain Network Community Structure in Older Adults: Data from the Brain Networks and Mobility Function (B-NET) Study**

**Blake Robert Neyland <sup>1,\*</sup>, Christina E Hugenschmidt <sup>1</sup>, Robert G Lyday <sup>2</sup>, Jonathan H Burdette <sup>2</sup>, Laura D Baker <sup>1</sup>, W Jack Rejeski <sup>4</sup>, Michael E Miller <sup>3</sup>, Stephen B Kritchevsky <sup>1</sup> and Paul J Laurienti <sup>2</sup>**

<sup>1</sup> Sticht Center for Healthy Aging and Alzheimer's Prevention, Department of Internal Medicine Section on Gerontology and Geriatric Medicine, Wake Forest School of Medicine, Winston-Salem, NC 27103, USA; chugensc@wakehealth.edu (C.E.H.); ldbaker@wakehealth.edu (L.D.B.); skritche@wakehealth.edu (S.B.K.)

<sup>2</sup> Department of Radiology, Wake Forest School of Medicine, Winston-Salem, NC 27103, USA; rlyday@wakehealth.edu (R.G.L.); jburdett@wakehealth.edu (J.H.B.); plaurien@wakehealth.edu (P.J.L.)

<sup>3</sup> Department of Biostatistics and Data Science, Wake Forest School of Medicine, Winston-Salem, NC 27103, USA; mmiller@wakehealth.edu

<sup>4</sup> Department of Health and Exercise Science, Wake Forest University, Winston-Salem, NC 27109, USA; rejeski@wfu.edu

\* Correspondence: bneyland@wakehealth.edu

## **Supplemental Methods:**

### **1. The Mobility Assessment Tool – short form (MAT-sf)**

The Mobility Assessment Tool – short form (MAT-sf) is a brief measure of older adults' self-perceptions of their ability to perform basic mobility-related tasks such as walking at different speeds and climbing stairs under different constraints. It takes less than 5 minutes to complete and uses 10 video clips of an avatar to depict these tasks that vary in difficulty [1]. The 10 items include: walking on even ground (1), slowly jogging (2), scaling a ramp with (3) and without (4) a handrail, stepping over hurdles (5), walking uphill outdoors on uneven ground (6), going up and down a set of stairs both using (7) and avoiding (8) the use of a handrail, and climbing stairs with one (9) or two (10) bags. Following the viewing of each item, participants are asked about their ability to complete the tasks. For items 1-2, participants are asked the duration for which they could complete the task in minutes between 0 and 60. Questions for items 3 and 4 inquire about the number of times they could complete the task ranging from 0 to 4. The questions following items 5-10 simply ask if participants could complete the task (e.g. yes or no). The 10 items were selected based on individual response and information curves derived from item response theory [1-3]. Information on specific difficulty ratings for each video can be found in the original publication [1].

### **2. Brain Network Analysis: Study-specific ROIs**

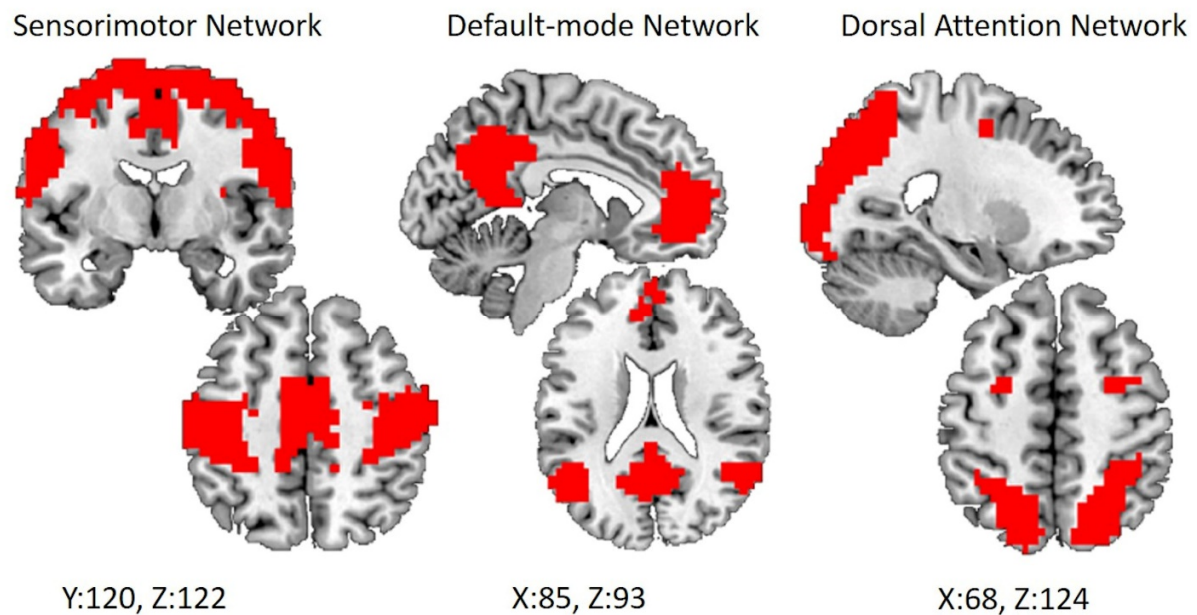

Figure S1: Study-specific regions of interest (ROI) generated for the three intrinsic networks of interest in the regional analyses.

## References

1. Rejeski, W. J.; Ip, E. H.; Marsh, A. P.; Barnard, R. T., Development and validation of a video-animated tool for assessing mobility. *The journals of gerontology. Series A, Biological sciences and medical sciences* **2010**, 65 (6), 664-671.
2. Marsh, A. P.; Ip, E. H.; Barnard, R. T.; Wong, Y.-L.; Rejeski, W. J., Using video animation to assess mobility in older adults. *The journals of gerontology. Series A, Biological sciences and medical sciences* **2011**, 66 (2), 217-227.
3. Rejeski, W. J.; Rushing, J.; Guralnik, J. M.; Ip, E. H.; King, A. C.; Manini, T. M.; Marsh, A. P.; McDermott, M. M.; Fielding, R. A.; Newman, A. B.; Tudor-Locke, C.; Gill, T. M.; Group, L. S., The MAT-sf: identifying risk for major mobility disability. *The journals of gerontology. Series A, Biological sciences and medical sciences* **2015**, 70 (5), 641-646.
